# Supplementary material for: Interfacial Synergetic Integration of Graphitic Carbon Nitride-Polypyrrole Anchored on Carbon Nanorod for Efficient Water Electrolysis
Source: Research Square preprint supplement (doi:10.21203/rs.3.rs-8005480/v1), 2025-11-26
Supplement: Supplementary file 1 [file c49998d5c76da7865f06c6b0.docx]

**Interfacial Synergetic integration of Graphitic Carbon Nitride-Polypyrrole Anchored on Carbon Nanorod For Efficient water Electrolysis.**

Anup Kumar Pradhan*,a ,Amrutha Radhakrishnan,a Anirban Biswas,a, Sankar Ganesh Palani,b and Chanchal Chakraborty*,a,c

aDepartment of Chemistry, Birla Institute of Technology and Science (BITS) Pilani, Hyderabad Campus. Jawaharnagar, Samirpet, Hyderabad, Telangana 500078, India.

bEnvironmental Biotechnology Laboratory, Department of Biological Sciences, Birla Institute of Technology and Science – Pilani, Hyderabad Campus, Hyderabad, Telangana 500078, India

cMaterials Center for Sustainable Energy & Environment (McSEE), Birla Institute of Technology and Science (BITS) Pilani, Hyderabad Campus, Hyderabad 500078, India

*Corresponding Author: Chanchal Chakraborty & Anup Kumar Pradhan

E-mail: [chanchal@hyderabad.bits-pilani.ac.in](mailto:chanchal@hyderabad.bits-pilani.ac.in)

E-mail: [p20220409@hyderabad.bits-pilani.ac.in](mailto:p20220409@hyderabad.bits-pilani.ac.in)


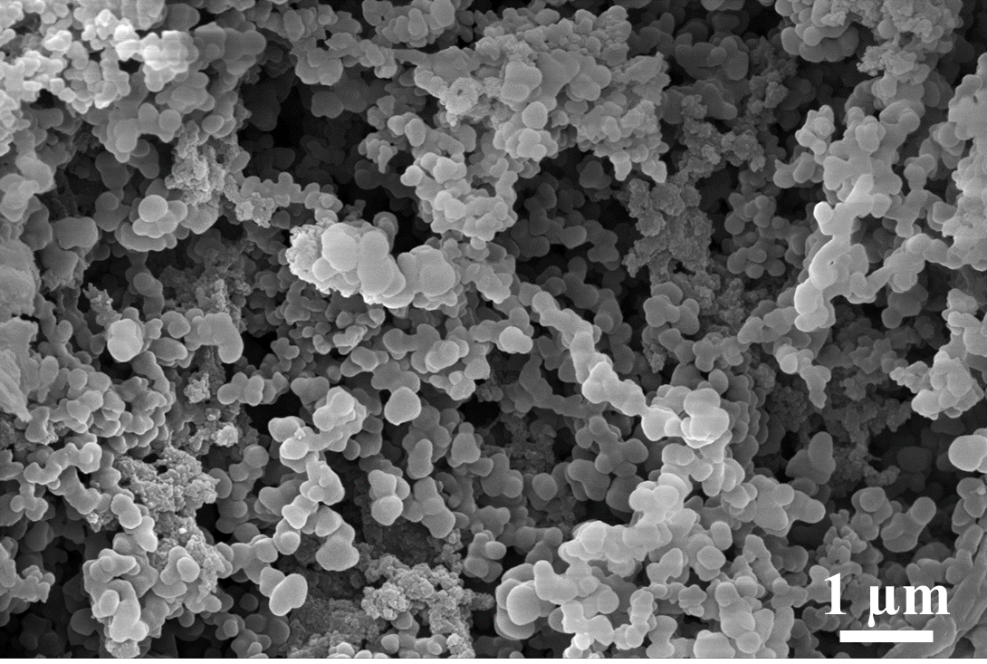


**Fig. S1.**  FE-SEM image of g-C3N4-Ppy.

**Fig. S2.**  XPS survey spectra of g-C3N4–Ppy/CR

**Fig. S3.**  CV curves obtained in the non-Faradic region of g-C3N4–Ppy/CR at different scan rates.

**Fig. S4.**  Calculated Cdl value of of g-C3N4–Ppy/CR obtained from CV curves

**Fig. S5.**  CV curves obtained in the non-Faradic region of g-C3N4–Ppy at different scan rates.

**Fig. S6.**  Calculated Cdl value of g-C3N4–Ppy obtained from CV curves.
